# Supplementary material
Source: ML conference proceedings conference paper supplement (https://proceedings.neurips.cc/paper_files/paper/2021/hash/edea298442a67de045e88dfb6e5ea4a2-Abstract.html)
Supplement: Supplementary file 1 [file edea298442a67de045e88dfb6e5ea4a2-Supplemental.pdf]

## A Appendix

### A.1 Quantization kinetics in the continuous time domain

The asymptotic quantization of weights  $\mathbf{W}$  using BDMM with a Lagrangian function  $\mathcal{L}$  follows the discrete updates,

$$\begin{aligned}\mathbf{W} &\leftarrow \mathbf{W} - \eta_W \nabla_{\mathbf{W}} \mathcal{L}(\mathbf{W}, \boldsymbol{\lambda}) \\ \boldsymbol{\lambda} &\leftarrow \boldsymbol{\lambda} + \eta_\lambda \nabla_{\boldsymbol{\lambda}} \mathcal{L}(\mathbf{W}, \boldsymbol{\lambda}),\end{aligned}$$

which can be expressed in the continuous time domain as follows.

$$\frac{d\mathbf{W}}{dt} = -\tau_W^{-1} \nabla_{\mathbf{W}} \mathcal{L}, \quad (1)$$

and

$$\frac{d\boldsymbol{\lambda}}{dt} = \tau_\lambda^{-1} \nabla_{\boldsymbol{\lambda}} \mathcal{L}, \quad (2)$$

where the reciprocal time constants  $\tau_W^{-1}$  and  $\tau_\lambda^{-1}$  are proportional to learning rates  $\eta_W$  and  $\eta_\lambda$ , respectively. The Lagrangian function  $\mathcal{L}$  is a Lyapunov function of  $\mathbf{W}$  and  $\boldsymbol{\lambda}$ .

$$\frac{d\mathcal{L}}{dt} = \nabla_{\mathbf{W}} \mathcal{L} \cdot \frac{d\mathbf{W}}{dt} + \nabla_{\boldsymbol{\lambda}} \mathcal{L} \cdot \frac{d\boldsymbol{\lambda}}{dt}. \quad (3)$$

Plugging Eqs. (1) and (2) into Eq. (3) yields

$$\frac{d\mathcal{L}}{dt} = -\tau_W^{-1} |\nabla_{\mathbf{W}} \mathcal{L}|^2 + \tau_\lambda^{-1} |\nabla_{\boldsymbol{\lambda}} \mathcal{L}|^2. \quad (4)$$

The gradients in Eq. (4) can be calculated from the Lagrangian function  $\mathcal{L}$ , given by

$$\mathcal{L} = C(\mathbf{y}^{(i)}, \hat{\mathbf{y}}^{(i)}; \mathbf{W}) + \boldsymbol{\lambda}^T \mathbf{cs}(\mathbf{W}),$$

as follows.

$$\begin{aligned}|\nabla_{\mathbf{W}} \mathcal{L}|^2 &= \sum_{i=0}^{n_w} \left( \frac{\partial C}{\partial w_i} + \lambda_i \frac{\partial cs_i}{\partial w_i} \right)^2, \\ |\nabla_{\boldsymbol{\lambda}} \mathcal{L}|^2 &= \sum_{i=0}^{n_w} cs_i^2.\end{aligned} \quad (5)$$

Therefore, the following equation holds.

$$\frac{d\mathcal{L}}{dt} = -\tau_W^{-1} \sum_{i=0}^{n_w} \left( \frac{\partial C}{\partial w_i} + \lambda_i \frac{\partial cs_i}{\partial w_i} \right)^2 + \tau_\lambda^{-1} \sum_{i=0}^{n_w} cs_i^2. \quad (6)$$

The Lagrange multiplier  $\lambda_i$  at time  $t$  is evaluated using Eq. (2).

$$\lambda_i(t) = \lambda_i(0) + \tau_\lambda^{-1} \int_0^t cs_i dt. \quad (7)$$

## A.2 Pseudocode

---

**Algorithm 1:** CBP algorithm.  $N$  denotes the number of training epochs in aggregate.  $M$  denotes the number of mini-batches of the training set  $\mathbf{Tr}$ . The function  $minibatch(\mathbf{Tr})$  samples a mini-batch of training data and their targets from  $\mathbf{Tr}$ . The function  $model(x, \mathbf{W})$  returns the output from the network for a given mini-batch  $x$ . The function  $clip(\mathbf{W})$  denotes the clipping weight, and  $\eta_W$  and  $\eta_\lambda$  denote the weight- and multiplier-learning rates, respectively.

---

**Result:** Updated weight matrix  $\mathbf{W}$   
Pre-training using conventional backprop;  
Initialization such that  $\lambda \leftarrow \mathbf{0}, p \leftarrow 0, g \leftarrow 1$ ;  
Initial update of  $\lambda$ ;  
**for**  $epoch = 1$  **to**  $N$  **do**  
     $\mathcal{L}_{sum} \leftarrow 0$ ;  
    /\* Update of weight  $\mathbf{W}$  \*/  
    **for**  $i = 1$  **to**  $M$  **do**  
         $\mathbf{x}^{(i)}, \hat{\mathbf{y}}^{(i)} \leftarrow minibatch(\mathbf{Tr})$ ;  
         $\mathbf{y}^{(i)} \leftarrow model(\mathbf{x}^{(i)}; \mathbf{W})$ ;  
         $\mathcal{L} \leftarrow C(\hat{\mathbf{y}}^{(i)}, \mathbf{y}^{(i)}; \mathbf{W}) + \lambda^T cs(\mathbf{W}; \mathbf{Q}, M, g)$ ;  
         $\mathcal{L}_{sum} \leftarrow \mathcal{L}_{sum} + \mathcal{L}$ ;  
         $\mathbf{W} \leftarrow clip(\mathbf{W} - \eta_W \nabla_{\mathbf{W}} \mathcal{L})$ ;  
    **end**  
    /\* Update of window variable  $g$  and Lagrange multiplier  $\lambda$  \*/  
     $p \leftarrow p + 1$ ;  
    **if**  $\mathcal{L}_{sum} \geq \mathcal{L}_{sum}^{pre}$  or  $p = p_{max}$  **then**  
         $g \leftarrow g + \Delta g$ ;  
         $\lambda \leftarrow \lambda + \eta_\lambda cs(\mathbf{W}, g)$ ;  
         $p \leftarrow 0$ ;  
         $\mathcal{L}_{sum}^{pre} \leftarrow \mathcal{L}_{sum}^{max}$ ;  
    **else**  
         $\mathcal{L}_{sum}^{pre} \leftarrow \mathcal{L}_{sum}$ ;  
    **end**  
**end**

---

## A.3 Quantization kinetics with gradually vanishing unconstrained-weight window

We consider the gradually vanishing unconstrained-weight window in addition to the kinetics of update of weights and lagrange multipliers in Eqs. (1) and (2). Given that the update frequency of the unconstrained-weight window variable  $g$  is equal to that of the Lagrange multipliers, its time constant equals  $\tau_\lambda$ .

$$\frac{dg}{dt} = \tau_\lambda^{-1} g_0, \quad (8)$$

where  $g_0 = 1$  when  $g < 10$ , and  $g_0 = 10$  otherwise. Regarding the Lagrangian function  $\mathcal{L}$  as a Lyapunov function of  $\mathbf{W}$ ,  $\lambda$ , and  $g$ , Eq. (3) should be modified as follow.

$$\frac{d\mathcal{L}}{dt} = \nabla_{\mathbf{W}} \mathcal{L} \cdot \frac{d\mathbf{W}}{dt} + \nabla_{\lambda} \mathcal{L} \cdot \frac{d\lambda}{dt} + \frac{\partial \mathcal{L}}{\partial g} \frac{dg}{dt}. \quad (9)$$

Plugging Eqs. (1), (2), and (8) into Eq. (9) yields

$$\frac{d\mathcal{L}}{dt} = -\tau_W^{-1} |\nabla_{\mathbf{W}} \mathcal{L}|^2 + \tau_\lambda^{-1} |\nabla_{\lambda} \mathcal{L}|^2 + \tau_\lambda^{-1} g_0 \frac{\partial \mathcal{L}}{\partial g}. \quad (10)$$

The gradients in Eq. (10) can be calculated using Eqs. (8), (9), and (10) as follows.

$$|\nabla_{\mathbf{W}}\mathcal{L}|^2 = \sum_{i=0}^{n_w} \left[ \frac{\partial C}{\partial w_i} + \lambda_i \left( ucs_i \frac{\partial Y_i}{\partial w_i} + Y_i \frac{\partial ucs_i}{\partial w_i} \right) \right]^2, \quad (11)$$

$$|\nabla_{\lambda}\mathcal{L}|^2 = \sum_{i=0}^{n_w} (ucs_i Y_i)^2,$$

$$\frac{\partial \mathcal{L}}{\partial g} = \frac{1}{2g^2} \sum_{i=0}^{n_w} \lambda_i Y_i \sum_{j=1}^{n_q-1} (q_{j+1} - q_j) \delta \left( \frac{1}{2g} (q_{j+1} - q_j) - |w_i - m_j + \epsilon| \right). \quad (12)$$

Given that  $\partial ucs_i / \partial w_i = 0$  holds for any  $w_i$  value because of  $\epsilon \rightarrow 0^+$ ,  $|\nabla_{\mathbf{W}}\mathcal{L}|^2$  is simplified as

$$|\nabla_{\mathbf{W}}\mathcal{L}|^2 = \sum_{i=0}^{n_w} \left( \frac{\partial C}{\partial w_i} + \lambda_i ucs_i \frac{\partial Y_i}{\partial w_i} \right)^2. \quad (13)$$

The gradient  $\partial \mathcal{L} / \partial g$  is non-zero only if a given weight  $w_i$  satisfies  $|w_i - m_j + \epsilon| = \frac{1}{2g} (q_{j+1} - q_j)$

The probability that  $w_i$  at a given time satisfies the equality for a given  $g$  should be very low. Additionally, regarding the discrete change in  $g$  in the actual application of the algorithm, the probability is negligible. Thus, this gradient can be ignored hereafter. Therefore, Eq. (10) can be re-expressed as

$$\frac{d\mathcal{L}}{dt} = -\tau_W^{-1} \sum_{i=0}^{n_w} \left( \frac{\partial C}{\partial w_i} + \lambda_i ucs_i \frac{\partial Y_i}{\partial w_i} \right)^2 + \tau_{\lambda}^{-1} \sum_{i=0}^{n_w} (ucs_i Y_i)^2. \quad (14)$$

Distinguishing the weights belonging to the unconstrained-weight window  $D_{ucs}$  from the others at a given time  $t$ , Eq. (14) can be written by

$$\frac{d\mathcal{L}}{dt} = -\tau_W^{-1} \sum_{w_i \in D_{ucs}} \left( \frac{\partial C}{\partial w_i} \right)^2 - \sum_{w_i \notin D_{ucs}} \left[ \tau_W^{-1} \left( \frac{\partial C}{\partial w_i} + \lambda_i \frac{\partial Y_i}{\partial w_i} \right)^2 - \tau_{\lambda}^{-1} Y_i^2 \right]. \quad (15)$$

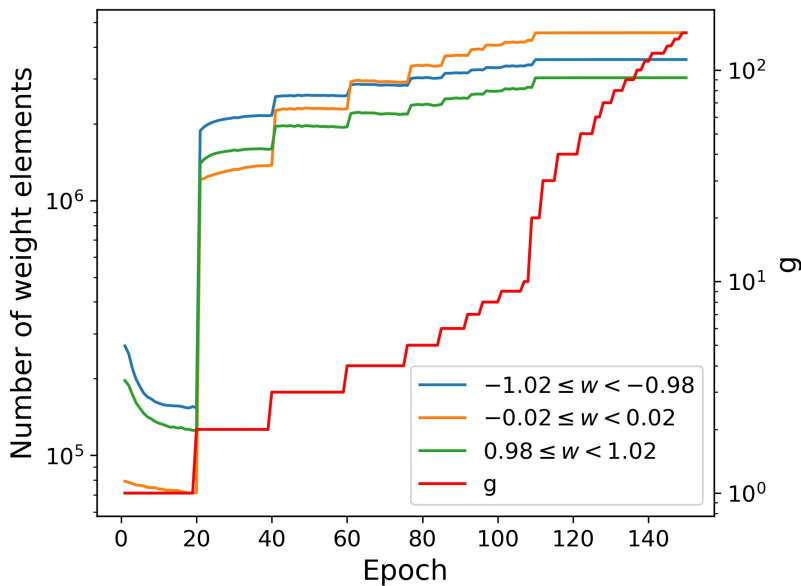

Figure 1: Weight-ternarization kinetics of ResNet-18 on ImageNet

#### A.4 Quantization kinetics in the discrete time domain

We monitored the population changes of weights near given quantized weight values for ResNet-18 on ImageNet with ternary-weight constraints. Fig. 1 shows the population changes of weights near -1, 0, and 1 upon the update of the unconstrained-weight window variable  $g$ . As such, the variable  $g$  was updated such that  $\Delta g = 1$  when  $g < 10$ , and  $\Delta g = 10$  otherwise. Step-wise increases in populations upon the increase of  $g$  are seen, indicating the obvious effect of the unconstrained-weight window on weight-quantization kinetics.

#### A.5 Hyperparameters

The hyperparameters used are listed in Table 1. The weight- and multiplier-learning rates are denoted by  $\eta_W$  and  $\eta_\lambda$ , respectively. The weight decay rate (L2 regularization) is denoted by  $wd$ .

Table 1: Hyperparameters used.

|               | AlexNet   |                |                    |            | ResNet-18 |                |           |            |
|---------------|-----------|----------------|--------------------|------------|-----------|----------------|-----------|------------|
|               | $\eta_W$  | $\eta_\lambda$ | $wd$               | batch size | $\eta_W$  | $\eta_\lambda$ | $wd$      | batch size |
| Binary        | $10^{-3}$ |                |                    |            |           |                |           |            |
| Ternary       |           | $10^{-4}$      | $5 \times 10^{-4}$ | 256        | $10^{-3}$ | $10^{-4}$      | $10^{-4}$ | 256        |
| One-bit shift | $10^{-4}$ |                |                    |            |           |                |           |            |
| Two-bit shift |           |                |                    |            |           |                |           |            |
|               | ResNet-50 |                |                    |            | GoogLeNet |                |           |            |
|               | $\eta_W$  | $\eta_\lambda$ | $wd$               | batch size | $\eta_W$  | $\eta_\lambda$ | $wd$      | batch size |
| Binary        | $10^{-3}$ |                |                    |            |           |                |           |            |
| Ternary       |           | $10^{-4}$      | $10^{-4}$          | 128        | $10^{-4}$ | $10^{-4}$      | $10^{-4}$ | 256        |
| One-bit shift | $10^{-4}$ |                |                    |            |           |                |           |            |
| Two-bit shift |           |                |                    |            |           |                |           |            |

## A.6 Computational complexity

CBP is a post-training method so that this number of FLOPs is an additional computational complexity to the pre-training using backprop.

#FLOPs for CBP = (#FLOPs for weight update) + (#FLOPs for Lagrange multiplier update), where

#FLOPs for weight update = (#FLOPs for loss evaluation) + (#FLOPs for error-backpropagation).

#FLOPs for loss evaluation = (#FLOPs for forward propagation) + (#FLOPs for constraint contribution calculation  $\lambda^T cs$ ).

The number of FLOPs for the latter scales with the number of parameters in total ( $n_w$ ) because each parameter is given a set of  $\lambda$  and  $cs$ . The number of multiplication  $\lambda \times cs_i (w_i)$  is the same as the number of parameters ( $n_w$ ). The calculation of  $cs_i$  for a given  $w_i$  involves six FLOPs according to Eqs. (8)-(10). Therefore,

#FLOPs for loss evaluation = (#FLOPs for forward propagation) +  $6n_w$ .

As for conventional backprop, the number of FLOPs for weight update (using error-backpropagation) approximately equals the number of FLOPs for forward propagation. Therefore,

#FLOPs for weight update =  $2 \times$  (#FLOPs for forward propagation) +  $6n_w$

The Lagrange multiplier update for each multiplier involves one multiplication ( $\eta_\lambda \times cs_i$ ) and one addition ( $\lambda_i \leftarrow \lambda_i + \eta_\lambda cs_i$ ), but uses  $cs_i$  that has been calculated already when calculating the loss function. Therefore,

#FLOPs for Lagrange multiplier update =  $2n_w$ .

It should be noted that the multiplier is updated merely a few times during the entire training period: less than 20 percent of the training epochs, which is parameterized by  $p$ .

Therefore, we have

#FLOPs for CBP =  $2$ (#FLOPs for forward propagation) +  $2(p + 3)n_w$

The number of FLOPs for CBP for three models (for  $p = 0.2$ ) is shown below.

**AlexNet:** #FLOPs for CBP  $\approx$  1.82G, and #FLOPs for BP  $\approx$  1.45G (i.e., 25% increase in #FLOPs)

**ResNet18:** #FLOPs for CBP  $\approx$  3.69G, and #FLOPs for BP  $\approx$  3.62G (i.e., 2% increase in #FLOPs)

**ResNet50:** #FLOPs for CBP  $\approx$  7.89G, and #FLOPs for BP  $\approx$  7.74G (i.e., 2% increase in #FLOPs)

## B Additional Data

### B.1 Extra Data

Processes of learning quantized weights in AlexNet, ResNet-18, ResNet-50, and GoogLeNet are shown in Fig. 2, 3, 4, and 5, respectively.

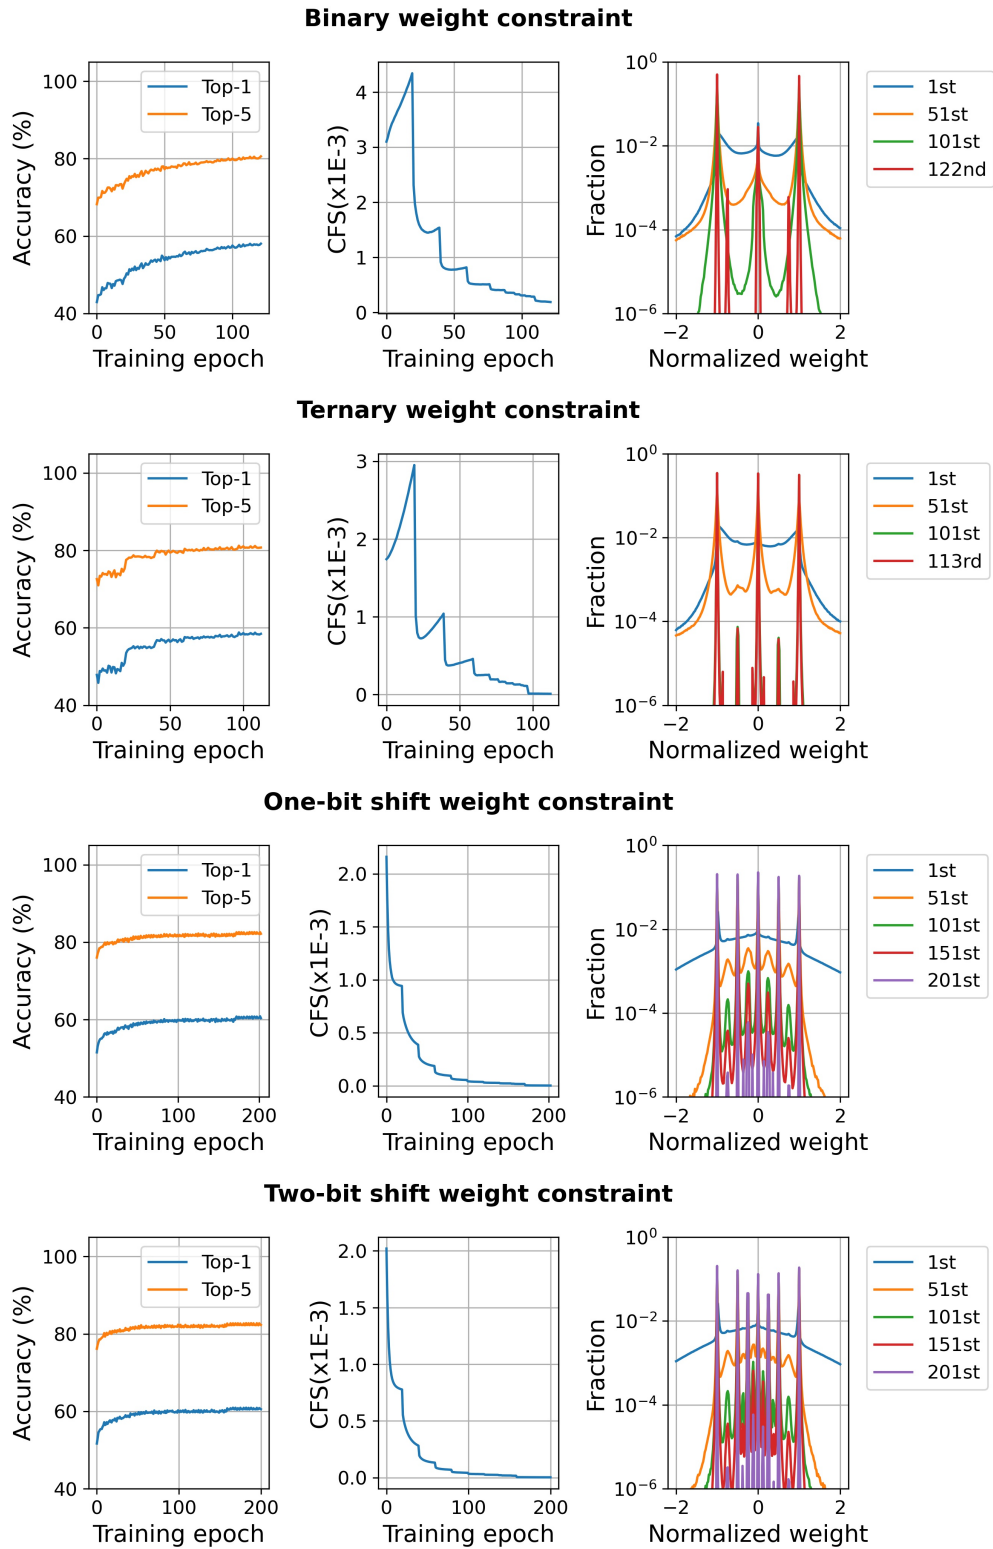

Figure 2: Learning quantized weights in AlexNet

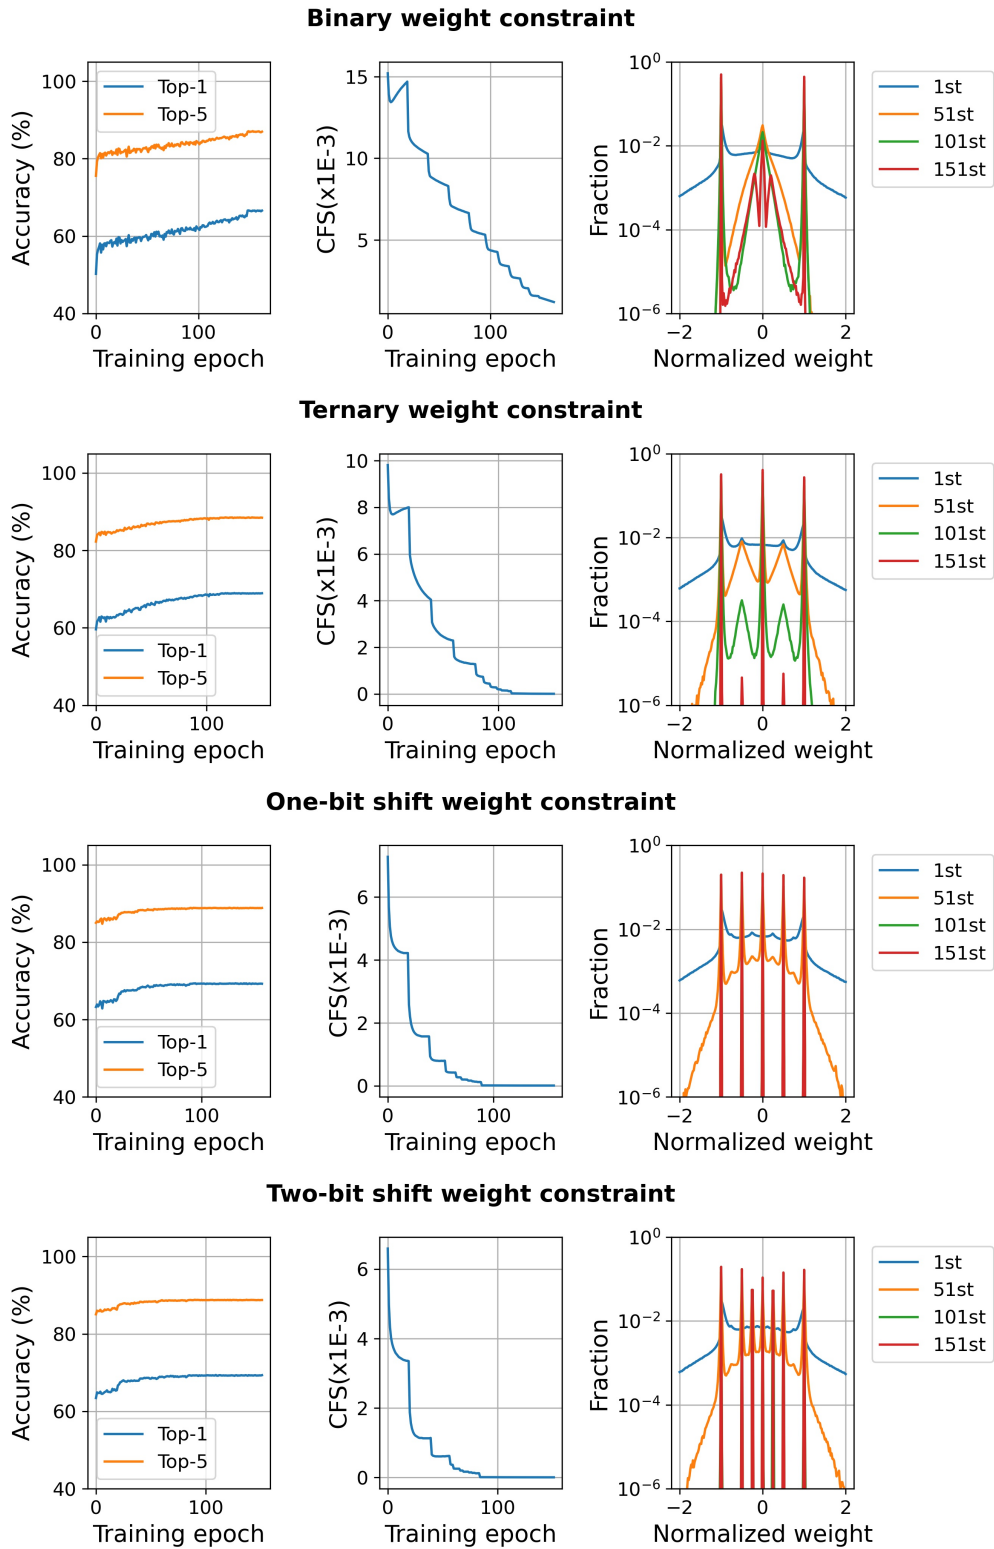

Figure 3: Learning quantized weights in ResNet-18

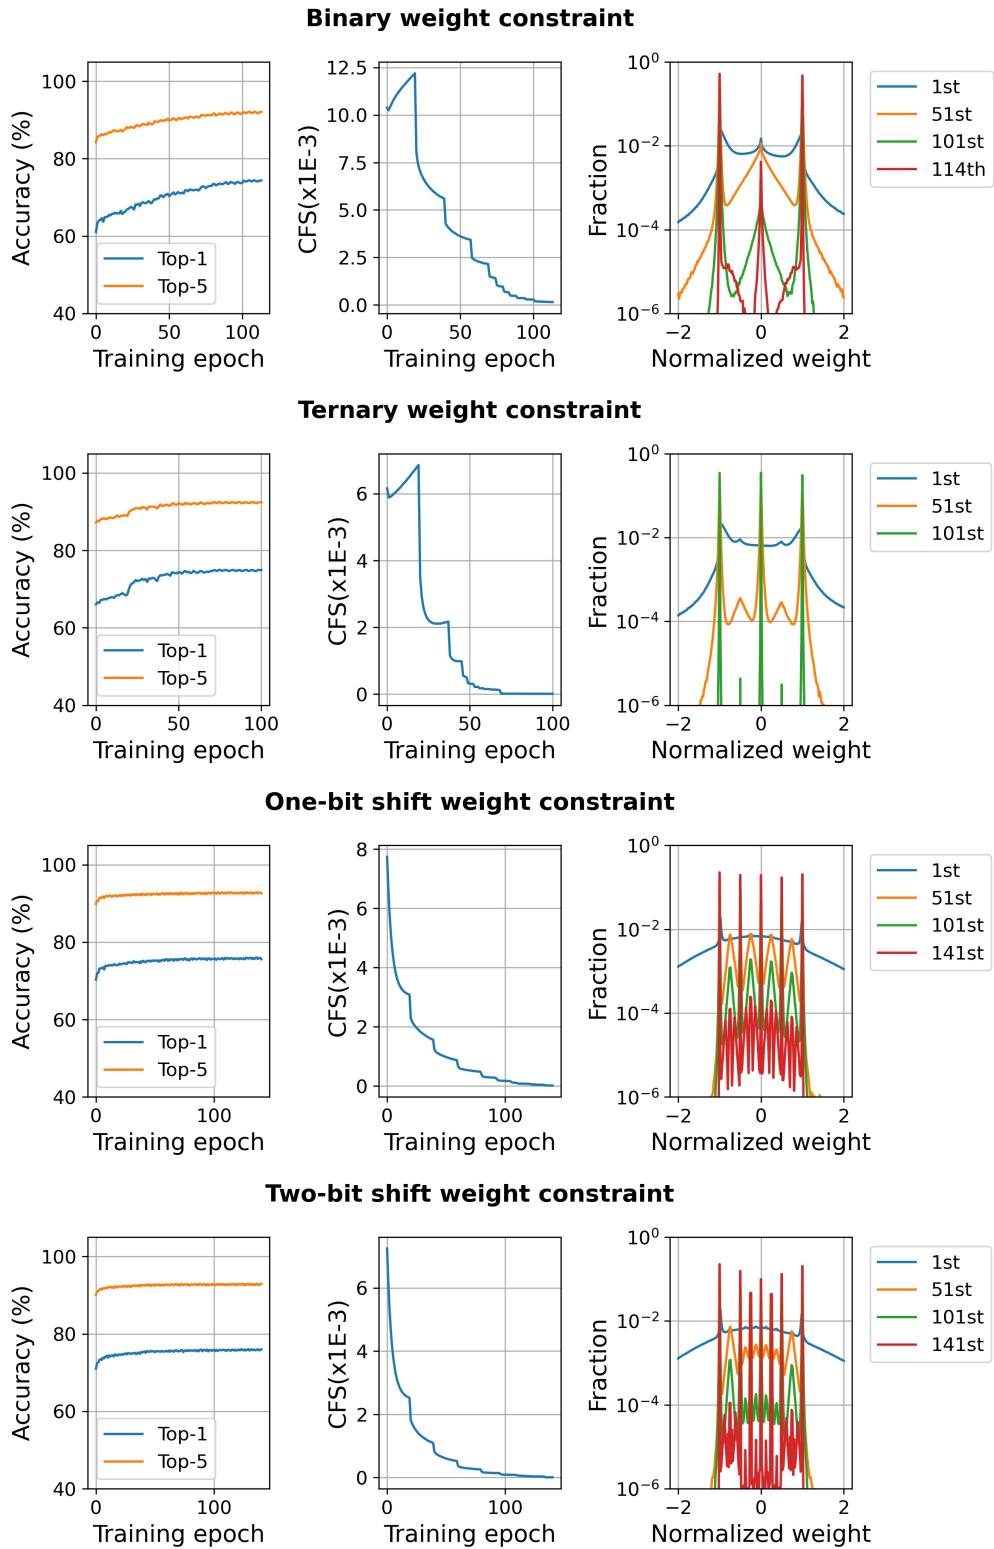

Figure 4: Learning quantized weights in ResNet-50



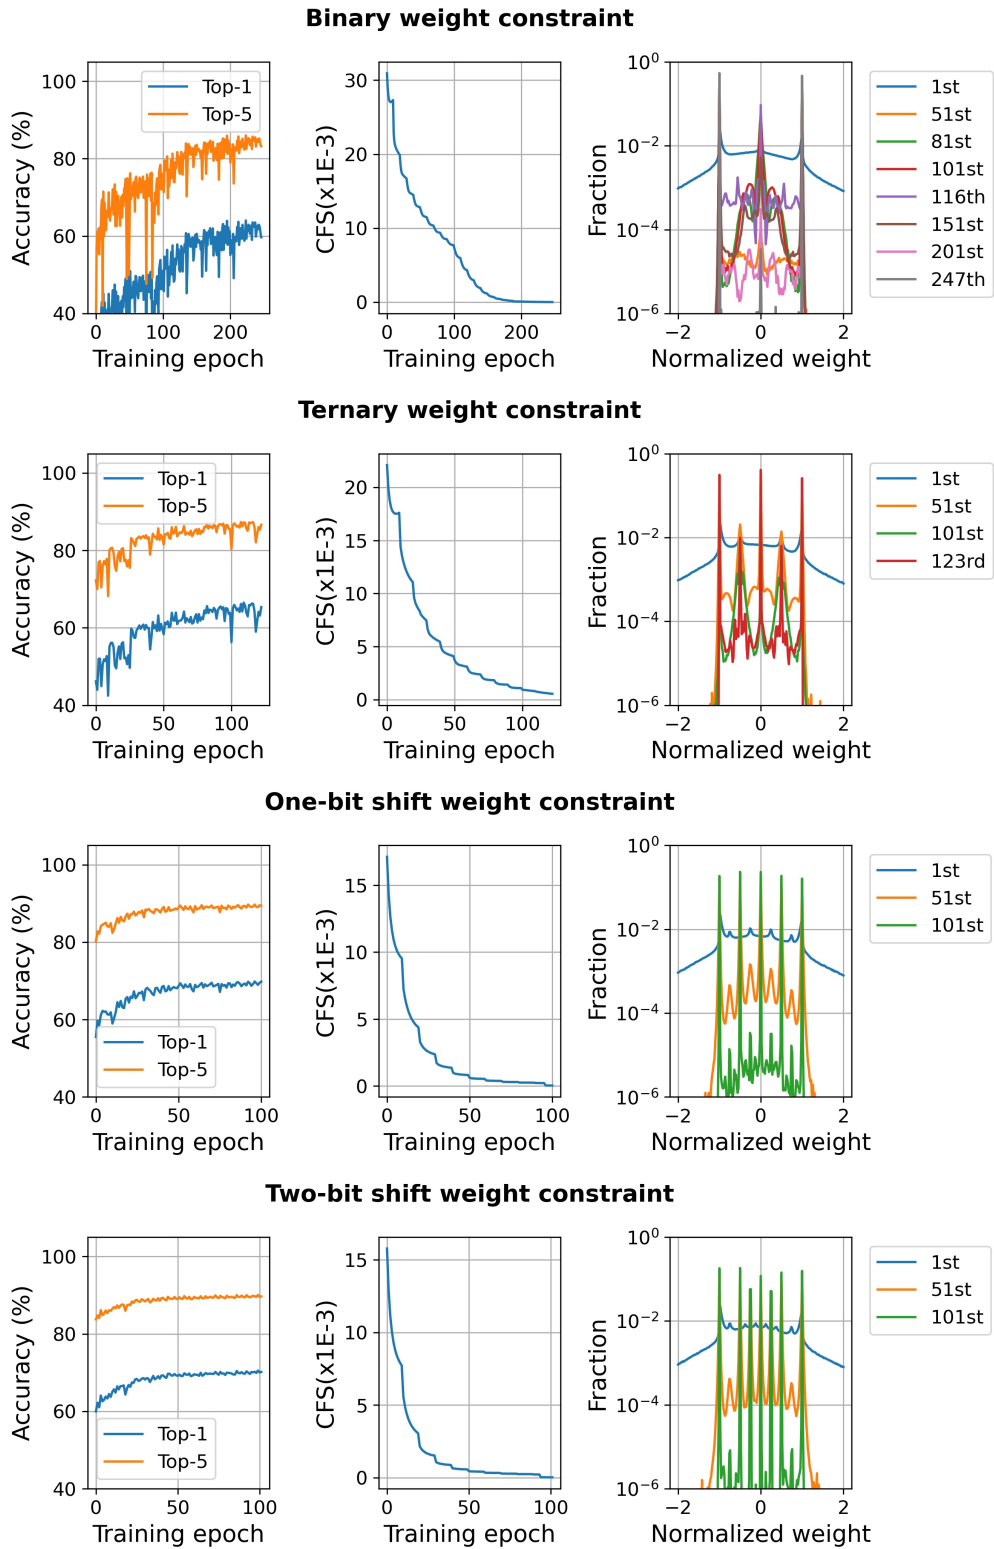

Figure 5: Learning quantized weights in GoogLeNet
